# Supplementary figures and images for: A double-sided microscope to realize whole-ganglion imaging of membrane potential in the medicinal leech
Source: eLife journal article supplement (doi:10.7554/elife.29839), 2017-09-25

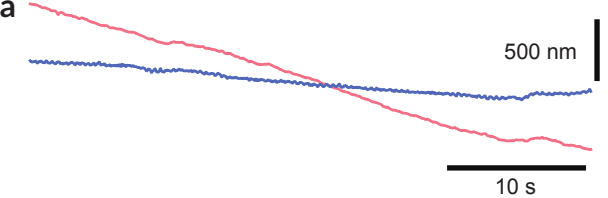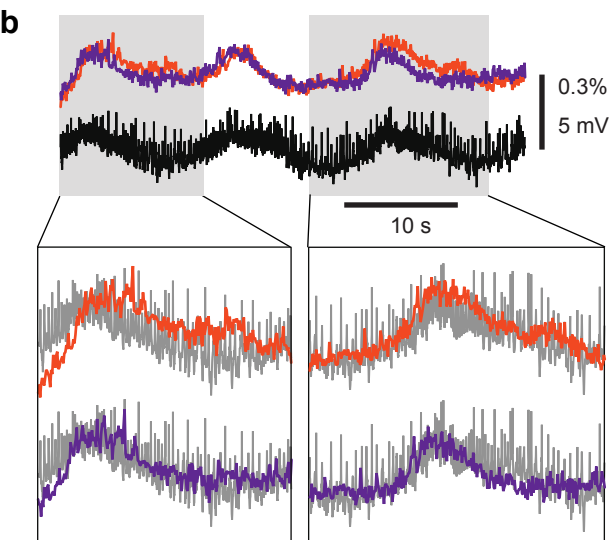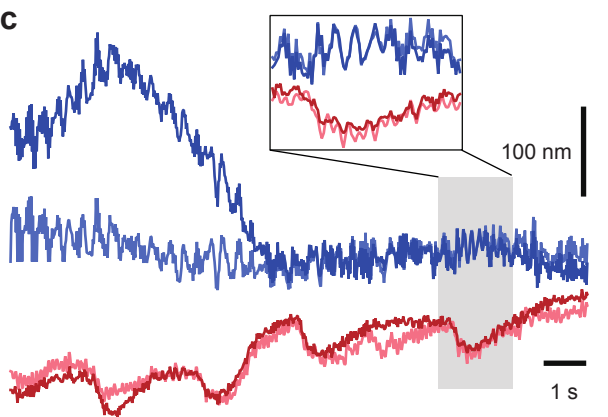

Supplement: supp [file elife-29839-supp-v1.zip]

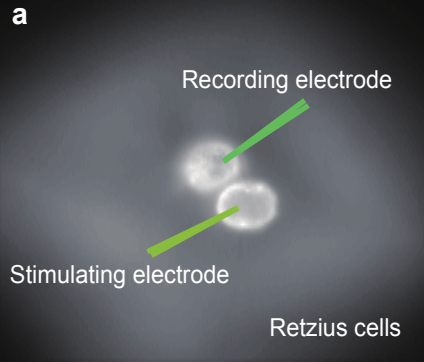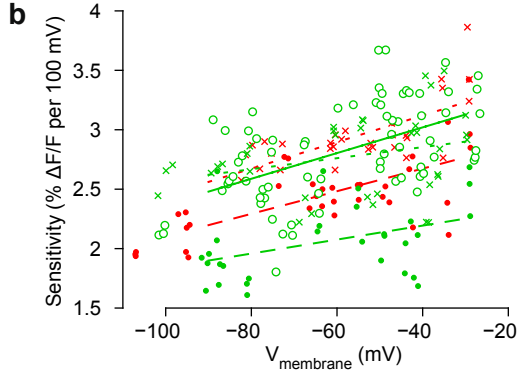

Supplement: supp [file elife-29839-supp-v1.zip]

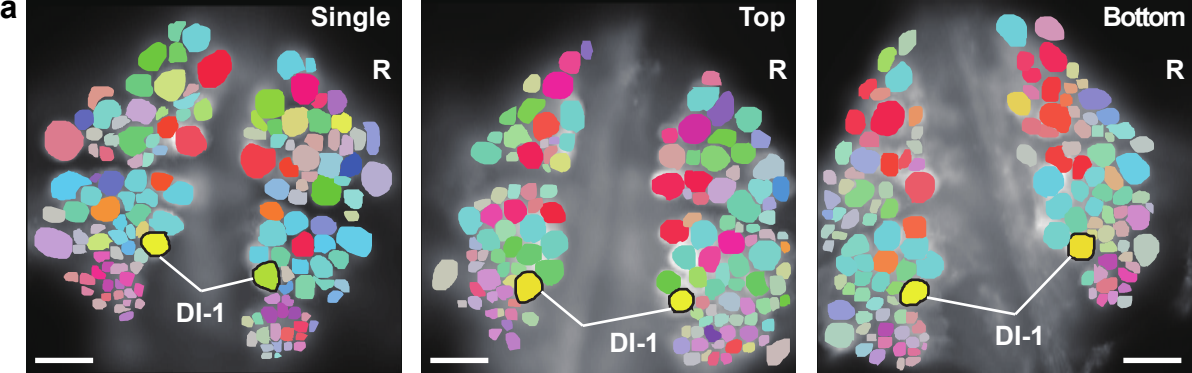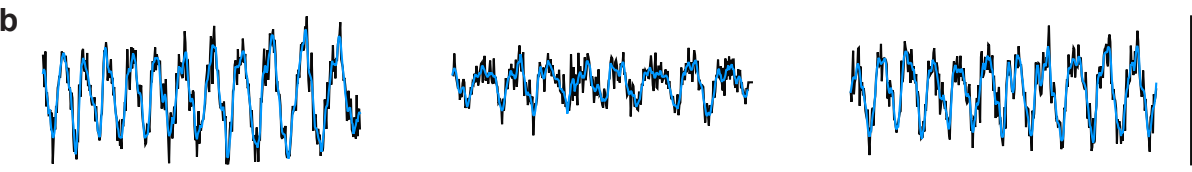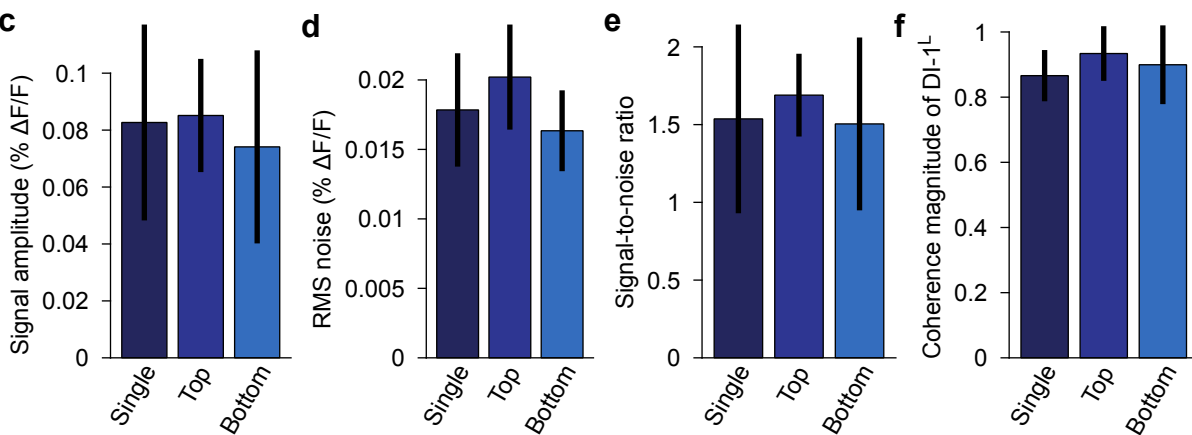

Supplement: supp [file elife-29839-supp-v1.zip]

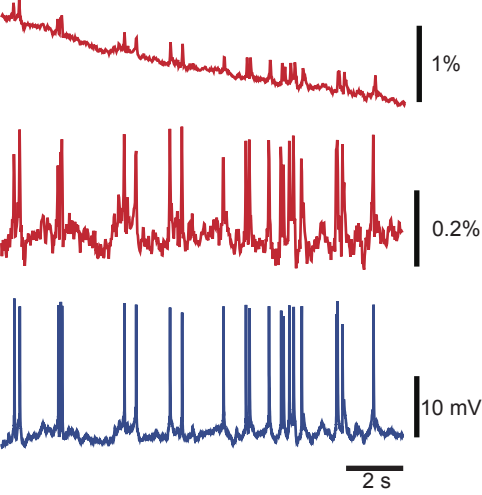

Supplement: supp [file elife-29839-supp-v1.zip]

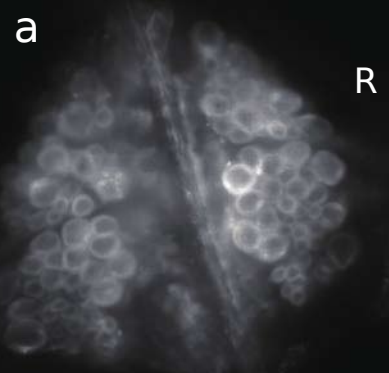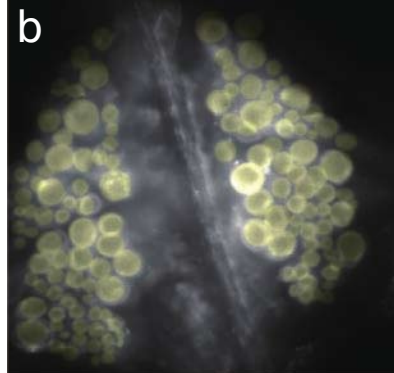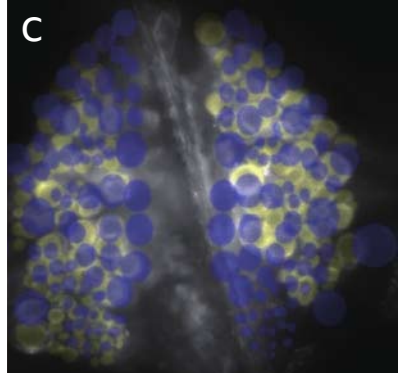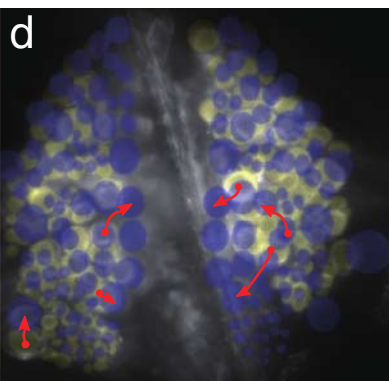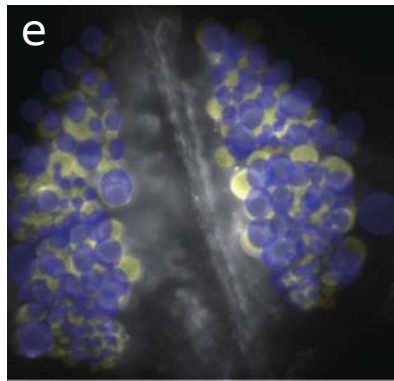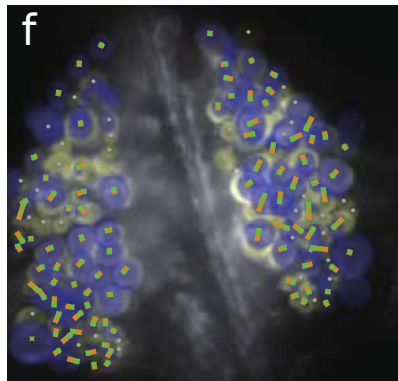

Supplement: supp [file elife-29839-supp-v1.zip]
